# Supplementary material
Source: PubMed Central journal article supplement (PMC2712218)
Supplement: 00033.2009_2.pdf [file 00033.2009_2.pdf]

**Table S1: Significantly enriched GO terms in the differentially expressed proteins identified using DAVID tool.**

| <b>Functional Terms</b> | <b>Count</b> | <b>P Value</b> | <b>Protein UNIPROT IDS</b>                                                                                                                                                                                                                                                                                                                                                                                                                                                                      |
|-------------------------|--------------|----------------|-------------------------------------------------------------------------------------------------------------------------------------------------------------------------------------------------------------------------------------------------------------------------------------------------------------------------------------------------------------------------------------------------------------------------------------------------------------------------------------------------|
| <b>Acetylation</b>      | 24           | 4.38E-20       | P00505, P06576, Q8NEZ4, Q53GB3, P00441, P02792, O75947, P63313, Q596K9, Q9UNM1, Q00325, Q8NCF7, P06733, P13929, Q9NPL4, P60660, Q8WVW5, P08670, Q53HU8, P62328, Q8N7G1, P42765, P09493, P32119, P60174, Q6FHP9, P02511, P63316, Q6FH91, Q6P6D7, P62158, Q9BRL5,                                                                                                                                                                                                                                 |
| <b>Cytoplasm</b>        | 47           | 3.83E-14       | Q53GB3, Q9NTJ5, Q53R15, P00441, Q9UNM1, P63313, Q596K9, Q96DD3, P06733, P13929, Q9NPL4, Q969V3, Q13011, P62328, P50461, P30048, Q53HC2, P09493, O43181, P08590, P63316, Q6FH91, Q9UKL3, P00505, P06576, P16219, P30049, Q6FG90, Q5TCW3, Q9BX68, O75947, Q9UBC5, Q00325, Q8NCF7, Q5QPQ0, Q06830, Q4ZG20, Q8WVW5, P28330, P08670, Q53HU8, P47985, Q8NBV9, Q7Z5G3, Q9NUB1, P30086, Q59EI6, P42765, Q99996, P32119, P11142, Q53GZ6, P17540, P02511, Q6IAQ7, Q9UII2, Q6P6D7, P62158, Q9BRL5, P09104, |
| <b>Cytoplasmic part</b> | 38           | 1.52E-13       | Q9NTJ5, Q53GB3, Q53R15, P00441, Q9UNM1, Q96DD3, P06733, P13929, Q9NPL4, Q969V3, Q13011, P50461, P30048, Q53HC2, P09493, O43181, P08590, P63316, Q6FH91, P00505, P06576, P16219, P30049, Q6FG90, Q5TCW3, Q9BX68, O75947, Q9UBC5, Q00325, Q8NCF7, Q06830, Q4ZG20, Q8WVW5, P28330, P47985, Q8NBV9, Q7Z5G3, Q9NUB1, P42765, Q99996, P11142, Q53GZ6, P17540, P02511, Q6IAQ7, Q9UII2, Q6P6D7, P09104,                                                                                                 |
| <b>Transit peptide</b>  | 16           | 7.94E-13       | P06576, Q53GB3, P00505, P30049, Q6FG90, P16219, Q00325, Q8NCF7, Q96DD3, Q13011, P28330, P47985, Q7Z5G3, Q9NUB1, P30048, Q53HC2, P42765, O43181, P17540, Q6IAQ7, Q9UII2,                                                                                                                                                                                                                                                                                                                         |

|                                       |    |          |                                                                                                                                                                                                                                                                                                                                                                                                                                                                                                                                                 |
|---------------------------------------|----|----------|-------------------------------------------------------------------------------------------------------------------------------------------------------------------------------------------------------------------------------------------------------------------------------------------------------------------------------------------------------------------------------------------------------------------------------------------------------------------------------------------------------------------------------------------------|
| <b>Direct protein sequencing</b>      | 31 | 1.37E-12 | P00441, P02792, Q9UNM1, P10916, Q6IB42, P06733, P13929, Q9NPL4, Q13011, P62328, Q8N7G1, P30048, Q53HC2, P09493, P08590, P63316, Q6FH91, P06576, P00505, P30049, Q6FG90, P16219, Q06830, P60660, Q8WVW5, P47985, P08670, Q53HU8, P30086, P42765, P32119, P11142, Q53GZ6, P17540, P60174, Q6FHP9, P02511, Q6P6D7, P62158, Q9BRL5, P09104,                                                                                                                                                                                                         |
| <b>Mitochondrion</b>                  | 18 | 2.28E-11 | P06576, Q53GB3, P00505, P16219, P30049, Q6FG90, O75947, Q9UNM1, Q00325, Q8NCF7, Q96DD3, Q13011, P28330, P47985, Q7Z5G3, Q9NUB1, P30048, Q53HC2, P42765, O43181, P17540, Q6IAQ7, Q9UII2,                                                                                                                                                                                                                                                                                                                                                         |
| <b>Mitochondrion</b>                  | 20 | 4.88E-11 | P06576, Q53GB3, P00505, P00441, P16219, P30049, Q6FG90, Q5TCW3, Q9BX68, O75947, Q9UNM1, Q00325, Q8NCF7, Q96DD3, Q13011, P28330, P47985, Q7Z5G3, Q9NUB1, P30048, Q53HC2, P42765, O43181, P17540, Q6IAQ7, Q9UII2,                                                                                                                                                                                                                                                                                                                                 |
| <b>Transit peptide: Mitochondrion</b> | 14 | 1.37E-10 | P06576, Q53GB3, P00505, P30049, Q6FG90, P16219, Q00325, Q8NCF7, Q96DD3, Q13011, P28330, P47985, Q7Z5G3, Q9NUB1, P30048, Q53HC2, P17540, Q6IAQ7, Q9UII2,                                                                                                                                                                                                                                                                                                                                                                                         |
| <b>Mitochondrial part</b>             | 15 | 6.39E-10 | P06576, Q53GB3, P00505, P00441, P30049, Q6FG90, P16219, Q9UNM1, Q00325, Q8NCF7, Q96DD3, P28330, P47985, Q7Z5G3, Q9NUB1, P42765, O43181, P17540,                                                                                                                                                                                                                                                                                                                                                                                                 |
| <b>Intracellular</b>                  | 52 | 8.80E-10 | Q9NTJ5, Q53R15, P00441, P63313, Q596K9, Q9UNM1, O00635, Q96DD3, Q969V3, P30048, Q53HC2, P09493, O43181, P08590, P63316, Q6FH91, P06576, Q5QPQ0, Q06830, Q4ZG20, P47985, P08670, Q53HU8, P28330, Q8NBV9, P32119, Q99996, P17540, P02511, Q6IAQ7, Q9UII2, Q6P6D7, P09104, Q8NEZ4, Q53GB3, P02792, P10916, Q6IB42, P06733, P13929, Q9NPL4, Q13011, P50461, P62328, P00505, Q9UKL3, P30049, Q6FG90, P16219, Q9UBC5, O75947, Q5TCW3, Q9BX68, Q00325, Q8NCF7, P60660, Q8WVW5, Q7Z5G3, Q9NUB1, Q59EI6, P30086, P42765, P11142, Q53GZ6, P62158, Q9BRL5, |

|                                                       |    |          |                                                                                                                                                                                                                                                                                                                                                                                                                                                                                                                                         |
|-------------------------------------------------------|----|----------|-----------------------------------------------------------------------------------------------------------------------------------------------------------------------------------------------------------------------------------------------------------------------------------------------------------------------------------------------------------------------------------------------------------------------------------------------------------------------------------------------------------------------------------------|
| <b>Intracellular part</b>                             | 51 | 1.15E-09 | Q9NTJ5, Q53R15, P00441, P63313, Q596K9, Q9UNM1, Q96DD3, Q969V3, P30048, Q53HC2, P09493, O43181, P08590, P63316, Q6FH91, P06576, Q5QPQ0, Q06830, Q4ZG20, P47985, P08670, Q53HU8, P28330, Q8NBV9, P32119, Q99996, P17540, Q6IAQ7, Q9UII2, P02511, Q6P6D7, P09104, Q8NEZ4, Q53GB3, P02792, P10916, Q6IB42, P06733, P13929, Q9NPL4, Q13011, P50461, P62328, P00505, Q9UKL3, P30049, Q6FG90, P16219, Q9UBC5, O75947, Q5TCW3, Q9BX68, Q00325, Q8NCF7, P60660, Q8WVW5, Q7Z5G3, Q9NUB1, Q59EI6, P30086, P42765, P11142, Q53GZ6, P62158, Q9BRL5, |
| <b>Contractile fiber</b>                              | 8  | 2.15E-09 | Q53R15, P09493, P02511, P08590, P63316, Q6FH91, Q4ZG20, Q8WVW5, P50461,                                                                                                                                                                                                                                                                                                                                                                                                                                                                 |
| <b>Contractile fiber part</b>                         | 7  | 5.31E-08 | Q53R15, P09493, P02511, P08590, P63316, Q6FH91, Q4ZG20, P50461,                                                                                                                                                                                                                                                                                                                                                                                                                                                                         |
| <b>Muscle system process</b>                          | 9  | 7.06E-08 | P00441, P09493, P10916, Q6IB42, P17540, P02511, P08590, P60660, P63316, Q6FH91, Q4ZG20,                                                                                                                                                                                                                                                                                                                                                                                                                                                 |
| <b>Muscle contraction</b>                             | 9  | 7.06E-08 | P00441, P09493, P10916, Q6IB42, P17540, P02511, P08590, P60660, P63316, Q6FH91, Q4ZG20,                                                                                                                                                                                                                                                                                                                                                                                                                                                 |
| <b>Generation of precursor metabolites and energy</b> | 14 | 1.31E-07 | P06576, Q53GB3, P30049, Q6FG90, P16219, O75947, Q00325, Q8NCF7, Q96DD3, Q4ZG20, Q13011, P28330, P47985, O43181, P17540, Q6IAQ7, Q9UII2,                                                                                                                                                                                                                                                                                                                                                                                                 |
| <b>Structural constituent of muscle</b>               | 6  | 1.53E-07 | Q53R15, P09493, P10916, Q6IB42, P08590, P60660, Q4ZG20,                                                                                                                                                                                                                                                                                                                                                                                                                                                                                 |
| <b>Muscle protein</b>                                 | 6  | 5.24E-07 | Q53R15, P09493, P10916, Q6IB42, P08590, P60660, P63316, Q6FH91,                                                                                                                                                                                                                                                                                                                                                                                                                                                                         |
| <b>Myofibril</b>                                      | 6  | 1.13E-06 | P09493, P02511, P63316, Q6FH91, Q4ZG20, Q8WVW5, P50461,                                                                                                                                                                                                                                                                                                                                                                                                                                                                                 |
| <b>Mitochondrial matrix</b>                           | 8  | 1.16E-06 | P00505, Q53GB3, Q7Z5G3, Q9NUB1, P00441, P16219, Q9UNM1, Q96DD3, P28330,                                                                                                                                                                                                                                                                                                                                                                                                                                                                 |
| <b>Mitochondrial lumen</b>                            | 8  | 1.16E-06 | P00505, Q53GB3, Q7Z5G3, Q9NUB1, P00441, P16219, Q9UNM1, Q96DD3, P28330,                                                                                                                                                                                                                                                                                                                                                                                                                                                                 |
| <b>Intracellular organelle</b>                        | 44 | 1.57E-06 | Q9NTJ5, Q8NEZ4, Q53GB3, Q53R15, P00441, Q9UNM1, P63313, Q596K9, P10916, Q6IB42, Q96DD3, P06733, P13929, Q9NPL4, Q969V3, Q13011, P62328, P50461, P30048, Q53HC2, P09493, O43181, P08590, P63316, Q6FH91, Q9UKL3, P00505, P06576, P16219, P30049, Q6FG90, Q5TCW3, Q9BX68, O75947,                                                                                                                                                                                                                                                         |

|                                     |    |          |                                                                                                                                                                                                                                                                                                                                                                                                                                                                         |
|-------------------------------------|----|----------|-------------------------------------------------------------------------------------------------------------------------------------------------------------------------------------------------------------------------------------------------------------------------------------------------------------------------------------------------------------------------------------------------------------------------------------------------------------------------|
|                                     |    |          | Q9UBC5, Q00325, Q8NCF7, Q06830, P60660, Q4ZG20, Q8WVW5, P28330, P08670, Q53HU8, P47985, Q8NBV9, Q7Z5G3, Q9NUB1, Q59EI6, P42765, Q99996, P11142, Q53GZ6, P17540, P02511, Q6IAQ7, Q9UII2,                                                                                                                                                                                                                                                                                 |
| <b>Organelle</b>                    | 44 | 1.60E-06 | Q9NTJ5, Q8NEZ4, Q53GB3, Q53R15, P00441, Q9UNM1, P63313, Q596K9, P10916, Q6IB42, Q96DD3, P06733, P13929, Q9NPL4, Q969V3, Q13011, P62328, P50461, P30048, Q53HC2, P09493, O43181, P08590, P63316, Q6FH91, Q9UKL3, P00505, P06576, P16219, P30049, Q6FG90, Q5TCW3, Q9BX68, O75947, Q9UBC5, Q00325, Q8NCF7, Q06830, P60660, Q4ZG20, Q8WVW5, P28330, P08670, Q53HU8, P47985, Q8NBV9, Q7Z5G3, Q9NUB1, Q59EI6, P42765, Q99996, P11142, Q53GZ6, P17540, P02511, Q6IAQ7, Q9UII2, |
| <b>Antioxidant</b>                  | 4  | 2.26E-06 | P00441, P30048, Q53HC2, P32119, Q06830,                                                                                                                                                                                                                                                                                                                                                                                                                                 |
| <b>Intracellular organelle part</b> | 27 | 5.41E-06 | Q53GB3, Q53R15, P00441, Q9UNM1, Q96DD3, P10916, Q6IB42, Q969V3, P09493, O43181, P08590, P63316, Q6FH91, P06576, P00505, P30049, Q6FG90, P16219, Q9UBC5, Q00325, Q8NCF7, P60660, Q4ZG20, P08670, Q53HU8, P28330, P47985, Q8WVW5, Q7Z5G3, Q9NUB1, P42765, Q99996, P17540,                                                                                                                                                                                                 |
| <b>Subunit</b>                      | 39 | 5.62E-06 | Q8NEZ4, Q53GB3, Q53R15, P00441, P02792, Q9UNM1, P10916, Q6IB42, P06733, P13929, Q9NPL4, Q969V3, Q13011, P50461, Q8N7G1, P30048, Q53HC2, P09493, P08590, Q9UKL3, P00505, P06576, P16219, P30049, Q6FG90, O75947, Q06830, P60660, Q8WVW5, P47985, P08670, Q53HU8, P28330, Q59EI6, P42765, Q5T2B7, Q99996, P32119, P11142, Q53GZ6, P60174, Q6FHP9, P17540, P02511, Q6P6D7, P62158, Q9BRL5, P09104,                                                                         |
| <b>Organelle part</b>               | 27 | 5.75E-06 | Q53GB3, Q53R15, P00441, Q9UNM1, Q96DD3, P10916, Q6IB42, Q969V3, P09493, O43181, P08590, P63316, Q6FH91, P06576, P00505, P30049, Q6FG90, P16219, Q9UBC5, Q00325, Q8NCF7, P60660, Q4ZG20, P08670, Q53HU8, P28330, P47985, Q8WVW5, Q7Z5G3, Q9NUB1,                                                                                                                                                                                                                         |

|                                     |    |          |                                                                                                                                                                                                                                         |
|-------------------------------------|----|----------|-----------------------------------------------------------------------------------------------------------------------------------------------------------------------------------------------------------------------------------------|
|                                     |    |          | P42765, Q99996, P17540,                                                                                                                                                                                                                 |
| <b>Domain: EF-hand 3</b>            | 6  | 8.56E-06 | Q53R15, P10916, Q6IB42, P08590, P60660, P63316, Q6FH91, P62158, Q9BRL5,                                                                                                                                                                 |
| <b>Myosin</b>                       | 5  | 9.81E-06 | Q53R15, Q9UBC5, P10916, Q6IB42, P08590, P60660,                                                                                                                                                                                         |
| <b>Glycolysis</b>                   | 5  | 1.17E-05 | P60174, Q6FHP9, Q96DD3, P06733, P13929, Q9NPL4, Q6P6D7, P09104,                                                                                                                                                                         |
| <b>Fatty acid metabolism</b>        | 5  | 1.28E-05 | P16219, Q5QPQ0, P42765, Q13011, P28330,                                                                                                                                                                                                 |
| <b>Miscellaneous</b>                | 15 | 1.29E-05 | Q8NEZ4, P00505, P00441, P16219, P10916, Q6IB42, Q06830, P06733, P13929, Q9NPL4, Q8WVW5, P28330, P47985, P30048, Q53HC2, P32119, P17540, P63316, Q6FH91, P62158, Q9BRL5,                                                                 |
| <b>Mitochondrial membrane</b>       | 9  | 1.88E-05 | Q53GB3, P06576, P30049, Q6FG90, Q00325, Q8NCF7, P42765, O43181, P17540, Q96DD3, P47985,                                                                                                                                                 |
| <b>Actin cytoskeleton</b>           | 8  | 2.08E-05 | Q53R15, Q9UBC5, P09493, P10916, Q6IB42, P08590, P60660, P63316, Q6FH91, Q8WVW5,                                                                                                                                                         |
| <b>Catalytic activity</b>           | 23 | 2.15E-05 | P00505, Q53GB3, Q8NEZ4, P06576, P00441, P16219, P30049, Q6FG90, O75947, Q5QPQ0, Q96DD3, P06733, P13929, Q9NPL4, Q06830, P28330, P47985, Q8N7G1, Q7Z5G3, Q9NUB1, P30048, Q53HC2, P42765, P32119, P60174, Q6FHP9, P17540, Q6P6D7, P09104, |
| <b>Sarcomere</b>                    | 5  | 2.29E-05 | P09493, P02511, P63316, Q6FH91, Q4ZG20, P50461,                                                                                                                                                                                         |
| <b>Muscle development</b>           | 7  | 2.52E-05 | Q53R15, P00441, P02511, P60660, Q4ZG20, Q8WVW5, P50461,                                                                                                                                                                                 |
| <b>Antioxidant activity</b>         | 5  | 2.56E-05 | P00441, P30048, Q53HC2, P32119, Q06830, Q4ZG20,                                                                                                                                                                                         |
| <b>Mitochondrial envelope</b>       | 9  | 2.66E-05 | Q53GB3, P06576, P30049, Q6FG90, Q00325, Q8NCF7, P42765, O43181, P17540, Q96DD3, P47985,                                                                                                                                                 |
| <b>Mitochondrial inner membrane</b> | 8  | 3.17E-05 | Q53GB3, P06576, P30049, Q6FG90, Q00325, Q8NCF7, P42765, O43181, P17540, P47985,                                                                                                                                                         |
| <b>Coenzyme metabolic process</b>   | 7  | 4.60E-05 | Q53GB3, P06576, Q7Z5G3, Q9NUB1, P00441, P30049, Q6FG90, O75947, P60174, Q6FHP9,                                                                                                                                                         |
| <b>Cytoskeleton</b>                 | 14 | 4.69E-05 | Q53R15, P63313, Q596K9, Q9UBC5, P10916, Q6IB42, P60660, Q8WVW5, P08670, Q53HU8, Q8NBV9, P50461, P62328, P09493, Q99996, P08590, P63316, Q6FH91,                                                                                         |

|                                                                                                                                     |    |          |                                                                                                                                                                                                         |
|-------------------------------------------------------------------------------------------------------------------------------------|----|----------|---------------------------------------------------------------------------------------------------------------------------------------------------------------------------------------------------------|
| <b>Organelle inner membrane</b>                                                                                                     | 8  | 4.89E-05 | Q53GB3, P06576, P30049, Q6FG90, Q00325, Q8NCF7, P42765, O43181, P17540, P47985,                                                                                                                         |
| <b>Glycolysis</b>                                                                                                                   | 5  | 5.22E-05 | P60174, Q6FHP9, Q96DD3, P06733, P13929, Q9NPL4, Q6P6D7, P09104,                                                                                                                                         |
| <b>Disease mutation</b>                                                                                                             | 15 | 5.74E-05 | P00441, P02792, P16219, Q9UBC5, Q00325, Q8NCF7, P10916, Q6IB42, P06733, P13929, Q9NPL4, Q8WVW5, P28330, P50461, Q8N7G1, P09493, P60174, Q6FHP9, P08590, P02511,                                         |
| <b>Protein complex</b>                                                                                                              | 19 | 5.79E-05 | P06576, Q53GB3, Q53R15, P00441, P30049, Q6FG90, P02792, O75947, Q9UBC5, P10916, Q6IB42, P06733, P13929, Q9NPL4, P60660, Q8WVW5, P47985, Q59E16, P30048, Q53HC2, O43181, P08590, P63316, Q6FH91, P09104, |
| <b>Proton-transporting ATP synthase complex</b>                                                                                     | 4  | 6.86E-05 | Q53GB3, P06576, P30049, Q6FG90, O75947,                                                                                                                                                                 |
| <b>Myosin complex</b>                                                                                                               | 5  | 7.87E-05 | Q53R15, Q9UBC5, P10916, Q6IB42, P08590, P60660,                                                                                                                                                         |
| <b>Glucose catabolic process</b>                                                                                                    | 5  | 9.39E-05 | P60174, Q6FHP9, Q96DD3, P06733, P13929, Q9NPL4, Q6P6D7, P09104,                                                                                                                                         |
| <b>Cofactor metabolic process</b>                                                                                                   | 7  | 1.25E-04 | Q53GB3, P06576, Q7Z5G3, Q9NUB1, P00441, P30049, Q6FG90, O75947, P60174, Q6FHP9,                                                                                                                         |
| <b>Acetylated amino end</b>                                                                                                         | 5  | 1.59E-04 | P00441, P02792, Q9UNM1, P62158, Q9BRL5, Q8WVW5,                                                                                                                                                         |
| <b>Hexose catabolic process</b>                                                                                                     | 5  | 1.63E-04 | P60174, Q6FHP9, Q96DD3, P06733, P13929, Q9NPL4, Q6P6D7, P09104,                                                                                                                                         |
| <b>Monosaccharide catabolic process</b>                                                                                             | 5  | 1.71E-04 | P60174, Q6FHP9, Q96DD3, P06733, P13929, Q9NPL4, Q6P6D7, P09104,                                                                                                                                         |
| <b>Domain:EF-hand 1</b>                                                                                                             | 6  | 1.74E-04 | Q53R15, P10916, Q6IB42, P08590, P60660, P63316, Q6FH91, P62158, Q9BRL5,                                                                                                                                 |
| <b>Domain:EF-hand 2</b>                                                                                                             | 6  | 1.80E-04 | Q53R15, P10916, Q6IB42, P08590, P60660, P63316, Q6FH91, P62158, Q9BRL5,                                                                                                                                 |
| <b>Alcohol catabolic process</b>                                                                                                    | 5  | 1.87E-04 | P60174, Q6FHP9, Q96DD3, P06733, P13929, Q9NPL4, Q6P6D7, P09104,                                                                                                                                         |
| <b>Methylation</b>                                                                                                                  | 6  | 2.29E-04 | Q53R15, P10916, Q6IB42, P02511, P08590, P62158, Q9BRL5, Q8WVW5,                                                                                                                                         |
| <b>Signal transduction mechanisms / Cytoskeleton / Cell division and chromosome partitioning / General function prediction only</b> | 5  | 2.37E-04 | Q53R15, P08590, P60660, P63316, Q6FH91, P62158, Q9BRL5,                                                                                                                                                 |
| <b>Regulation of muscle contraction</b>                                                                                             | 4  | 2.47E-04 | P00441, P09493, P10916, Q6IB42, P63316, Q6FH91,                                                                                                                                                         |
| <b>Fatty acid metabolic process</b>                                                                                                 | 6  | 2.79E-04 | P16219, Q5QPQ0, P42765, P60174, Q6FHP9, Q13011, P28330,                                                                                                                                                 |
| <b>Peroxidase activity</b>                                                                                                          | 4  | 2.86E-04 | P30048, Q53HC2, P32119, Q06830, Q4ZG20,                                                                                                                                                                 |
| <b>Oxidoreductase activity, acting</b>                                                                                              | 4  | 2.86E-04 | P30048, Q53HC2, P32119, Q06830,                                                                                                                                                                         |

|                                                                                             |    |          |                                                                                                 |
|---------------------------------------------------------------------------------------------|----|----------|-------------------------------------------------------------------------------------------------|
| <b>on peroxide as acceptor</b>                                                              |    |          | Q4ZG20,                                                                                         |
| <b>Hydrogen ion transporting ATP synthase activity, rotational mechanism</b>                | 4  | 2.86E-04 | Q53GB3, P06576, P30049, Q6FG90, O75947,                                                         |
| <b>Hydrogen ion transporting ATPase activity, rotational mechanism</b>                      | 4  | 3.07E-04 | Q53GB3, P06576, P30049, Q6FG90, O75947,                                                         |
| <b>Oxidoreductase</b>                                                                       | 9  | 3.11E-04 | P00441, P16219, P30048, Q53HC2, P32119, O43181, Q96DD3, Q06830, P47985, P28330,                 |
| <b>Motor protein</b>                                                                        | 5  | 3.59E-04 | Q53R15, Q9UBC5, P10916, Q6IB42, P08590, P60660,                                                 |
| <b>Organelle envelope</b>                                                                   | 9  | 3.79E-04 | Q53GB3, P06576, P30049, Q6FG90, Q00325, Q8NCF7, P42765, O43181, P17540, Q96DD3, P47985,         |
| <b>Envelope</b>                                                                             | 9  | 3.88E-04 | Q53GB3, P06576, P30049, Q6FG90, Q00325, Q8NCF7, P42765, O43181, P17540, Q96DD3, P47985,         |
| <b>Cross-link: Glycyl lysine isopeptide (Lys-Gly) (interchain with G-Cter in ubiquitin)</b> | 5  | 4.14E-04 | Q9UKL3, P30049, Q6FG90, P09493, Q96DD3, P62158, Q9BRL5,                                         |
| <b>Oxidoreductase activity</b>                                                              | 11 | 4.66E-04 | P00441, P16219, P02792, P30048, Q53HC2, P32119, O43181, Q96DD3, Q06830, Q4ZG20, P47985, P28330, |
| <b>ATP synthesis coupled proton transport</b>                                               | 4  | 4.73E-04 | Q53GB3, P06576, P30049, Q6FG90, O75947,                                                         |
| <b>Cellular carbohydrate catabolic process</b>                                              | 5  | 4.80E-04 | P60174, Q6FHP9, Q96DD3, P06733, P13929, Q9NPL4, Q6P6D7, P09104,                                 |
| <b>Lipid metabolism</b>                                                                     | 5  | 5.16E-04 | P16219, Q5QPQ0, P42765, Q13011, P28330,                                                         |
| <b>Carboxylic acid metabolic process</b>                                                    | 9  | 5.45E-04 | P00505, Q59EI6, P16219, Q5QPQ0, P42765, O43181, P60174, Q6FHP9, Q13011, P28330,                 |
| <b>Organic acid metabolic process</b>                                                       | 9  | 5.65E-04 | P00505, Q59EI6, P16219, Q5QPQ0, P42765, O43181, P60174, Q6FHP9, Q13011, P28330,                 |
| <b>Oxidative phosphorylation</b>                                                            | 5  | 5.68E-04 | Q53GB3, P06576, P30049, Q6FG90, O75947, O43181,                                                 |
| <b>Carbohydrate catabolic process</b>                                                       | 5  | 6.06E-04 | P60174, Q6FHP9, Q96DD3, P06733, P13929, Q9NPL4, Q6P6D7, P09104,                                 |
| <b>Glucose metabolic process</b>                                                            | 5  | 6.26E-04 | P60174, Q6FHP9, Q96DD3, P06733, P13929, Q9NPL4, Q6P6D7, P09104,                                 |
| <b>Nucleoside phosphate metabolic process</b>                                               | 4  | 6.42E-04 | Q53GB3, P06576, P30049, Q6FG90, O75947,                                                         |
| <b>ATP biosynthetic process</b>                                                             | 4  | 6.42E-04 | Q53GB3, P06576, P30049, Q6FG90, O75947,                                                         |
| <b>Alcohol metabolic process</b>                                                            | 7  | 6.59E-04 | P00441, P42765, P60174, Q6FHP9, Q96DD3, P06733, P13929, Q9NPL4, Q6P6D7, P09104,                 |
| <b>Cation-transporting ATPase</b>                                                           | 4  | 6.71E-04 | Q53GB3, P06576, P30049, Q6FG90,                                                                 |

|                                                                       |    |                |                                                                                                                                                                                                                                                                                                                         |
|-----------------------------------------------------------------------|----|----------------|-------------------------------------------------------------------------------------------------------------------------------------------------------------------------------------------------------------------------------------------------------------------------------------------------------------------------|
| <b>Activity</b>                                                       |    |                | O75947,                                                                                                                                                                                                                                                                                                                 |
| <b>Hydrogen ion transport</b>                                         | 4  | 6.75E-04       | Q53GB3, P06576, P30049, Q6FG90, O75947,                                                                                                                                                                                                                                                                                 |
| <b>Catalytic activity</b>                                             | 31 | 7.60E-04       | Q8NEZ4, Q53GB3, P00441, P02792, Q96DD3, P06733, P13929, Q9NPL4, Q13011, Q8N7G1, P30048, Q53HC2, O43181, P06576, P00505, P30049, Q6FG90, P16219, Q5TCW3, Q9BX68, O75947, Q5QPQ0, Q06830, P60660, Q4ZG20, P47985, P28330, Q7Z5G3, Q9NUB1, Q59EI6, P42765, P32119, P11142, Q53GZ6, P17540, P60174, Q6FHP9, Q6P6D7, P09104, |
| <b>Hsa00010:Glycolysis / Gluconeogenesis</b>                          | 5  | 7.72E-04       | Q7Z5G3, Q9NUB1, P60174, Q6FHP9, P06733, P13929, Q9NPL4, Q6P6D7, P09104,                                                                                                                                                                                                                                                 |
| <b>Macromolecular complex</b>                                         | 19 | 8.45E-04       | P06576, Q53GB3, Q53R15, P00441, P30049, Q6FG90, P02792, O75947, Q9UBC5, P10916, Q6IB42, P06733, P13929, Q9NPL4, P60660, Q8WVW5, P47985, Q59EI6, P30048, Q53HC2, O43181, P08590, P63316, Q6FH91, P09104,                                                                                                                 |
| <b>ATP metabolic process</b>                                          | 4  | 9.83E-04       | Q53GB3, P06576, P30049, Q6FG90, O75947,                                                                                                                                                                                                                                                                                 |
| <b>Identical protein binding</b>                                      | 7  | 0.001048<br>96 | Q9UKL3, P00441, P02792, P30048, Q53HC2, Q6IAQ7, Q9UII2, Q4ZG20, Q8WVW5,                                                                                                                                                                                                                                                 |
| <b>Hydrogen ion transmembrane transporter activity</b>                | 5  | 0.001087       | Q53GB3, P06576, P30049, Q6FG90, O75947, P47985,                                                                                                                                                                                                                                                                         |
| <b>nucleotide metabolic process</b>                                   | 6  | 0.001125<br>61 | Q53GB3, P06576, P30049, Q6FG90, O75947, P60174, Q6FHP9, Q6IAQ7, Q9UII2,                                                                                                                                                                                                                                                 |
| <b>Proton-transporting two-sector ATPase complex</b>                  | 4  | 0.001189<br>65 | Q53GB3, P06576, P30049, Q6FG90, O75947,                                                                                                                                                                                                                                                                                 |
| <b>Ubl conjugation</b>                                                | 7  | 0.001215<br>05 | Q9UKL3, P00441, P30049, Q6FG90, P09493, Q5T2B7, Q96DD3, P62158, Q9BRL5,                                                                                                                                                                                                                                                 |
| <b>Monocarboxylic acid metabolic process</b>                          | 6  | 0.001257<br>26 | P16219, Q5QPQ0, P42765, P60174, Q6FHP9, Q13011, P28330,                                                                                                                                                                                                                                                                 |
| <b>Monovalent inorganic cation transmembrane transporter activity</b> | 5  | 0.001416<br>65 | Q53GB3, P06576, P30049, Q6FG90, O75947, P47985,                                                                                                                                                                                                                                                                         |
| <b>Nucleobase, nucleoside and nucleotide metabolic process</b>        | 6  | 0.001424<br>92 | Q53GB3, P06576, P30049, Q6FG90, O75947, P60174, Q6FHP9, Q6IAQ7, Q9UII2,                                                                                                                                                                                                                                                 |
| <b>Motor activity</b>                                                 | 5  | 0.001517<br>44 | Q53R15, Q9UBC5, P10916, Q6IB42, P08590, P60660,                                                                                                                                                                                                                                                                         |
| <b>Cytoskeleton organization and biogenesis</b>                       | 8  | 0.001663<br>57 | P00441, P63313, Q596K9, P60660, Q4ZG20, Q8WVW5, P08670, Q53HU8, Q8NBV9, P62328,                                                                                                                                                                                                                                         |
| <b>Purine nucleoside triphosphate biosynthetic process</b>            | 4  | 0.001681<br>28 | Q53GB3, P06576, P30049, Q6FG90, O75947,                                                                                                                                                                                                                                                                                 |



|                                                                |    |                |                                                                                                                                                                         |
|----------------------------------------------------------------|----|----------------|-------------------------------------------------------------------------------------------------------------------------------------------------------------------------|
| <b>Purine ribonucleoside triphosphate biosynthetic process</b> | 4  | 0.001681<br>28 | Q53GB3, P06576, P30049, Q6FG90, O75947,                                                                                                                                 |
| <b>Ribonucleoside triphosphate biosynthetic process</b>        | 4  | 0.001750<br>3  | Q53GB3, P06576, P30049, Q6FG90, O75947,                                                                                                                                 |
| <b>Hsa00190:Oxidative phosphorylation</b>                      | 6  | 0.001850<br>11 | Q53GB3, P06576, P30049, Q6FG90, O75947, O43181, P47985,                                                                                                                 |
| <b>Nucleoside triphosphate biosynthetic process</b>            | 4  | 0.001893<br>6  | Q53GB3, P06576, P30049, Q6FG90, O75947,                                                                                                                                 |
| <b>Cytoskeletal part</b>                                       | 9  | 0.001959<br>22 | Q53R15, Q9UBC5, P09493, Q99996, P10916, Q6IB42, P08590, P60660, P63316, Q6FH91, P08670, Q53HU8,                                                                         |
| <b>Cytoskeletal protein binding</b>                            | 7  | 0.002012<br>45 | Q9UBC5, P63313, Q596K9, P09493, P63316, Q6FH91, Q4ZG20, Q8NBV9, P62328,                                                                                                 |
| <b>Hexose metabolic process</b>                                | 5  | 0.002166<br>22 | P60174, Q6FHP9, Q96DD3, P06733, P13929, Q9NPL4, Q6P6D7, P09104,                                                                                                         |
| <b>ATPase activity, coupled</b>                                | 6  | 0.002265<br>72 | Q53GB3, P06576, P30049, Q6FG90, O75947, P11142, Q53GZ6, P60660,                                                                                                         |
| <b>Skeletal muscle development</b>                             | 4  | 0.002283<br>27 | P60660, Q4ZG20, Q8WVW5, P50461,                                                                                                                                         |
| <b>Purine ribonucleoside triphosphate metabolic process</b>    | 4  | 0.002283<br>27 | Q53GB3, P06576, P30049, Q6FG90, O75947,                                                                                                                                 |
| <b>Purine nucleoside triphosphate metabolic process</b>        | 4  | 0.002366<br>71 | Q53GB3, P06576, P30049, Q6FG90, O75947,                                                                                                                                 |
| <b>Ribonucleoside triphosphate metabolic process</b>           | 4  | 0.002366<br>71 | Q53GB3, P06576, P30049, Q6FG90, O75947,                                                                                                                                 |
| <b>Monosaccharide metabolic process</b>                        | 5  | 0.002414<br>11 | P60174, Q6FHP9, Q96DD3, P06733, P13929, Q9NPL4, Q6P6D7, P09104,                                                                                                         |
| <b>Cytoplasm</b>                                               | 17 | 0.002464<br>34 | Q9UKL3, P00441, P63313, Q596K9, Q5QPQ0, Q06830, P06733, P13929, Q9NPL4, Q8WVW5, Q8NBV9, P50461, P62328, P30086, Q59EI6, P09493, Q99996, P32119, P11142, Q53GZ6, P09104, |
| <b>System process</b>                                          | 13 | 0.002489<br>93 | P00441, Q9UBC5, P10916, Q6IB42, P60660, Q4ZG20, Q8WVW5, P50461, P09493, Q99996, P17540, P08590, P02511, P63316, Q6FH91,                                                 |
| <b>Non-membrane-bound organelle</b>                            | 15 | 0.002760<br>91 | Q53R15, P63313, Q596K9, Q9UBC5, P10916, Q6IB42, P60660, Q4ZG20, Q8WVW5, P08670, Q53HU8, Q8NBV9, P50461, P62328, P09493, Q99996, P08590, P63316, Q6FH91,                 |
| <b>Intracellular non-membrane-bound organelle</b>              | 15 | 0.002760<br>91 | Q53R15, P63313, Q596K9, Q9UBC5, P10916, Q6IB42, P60660, Q4ZG20, Q8WVW5, P08670, Q53HU8, Q8NBV9, P50461, P62328, P09493, Q99996, P08590, P63316, Q6FH91,                 |
| <b>Purine ribonucleotide biosynthetic process</b>              | 4  | 0.003003<br>98 | Q53GB3, P06576, P30049, Q6FG90, O75947,                                                                                                                                 |

|                                                                   |    |            |                                                                                                 |
|-------------------------------------------------------------------|----|------------|-------------------------------------------------------------------------------------------------|
| <b>Nucleoside triphosphate metabolic process</b>                  | 4  | 0.00310278 | Q53GB3, P06576, P30049, Q6FG90, O75947,                                                         |
| <b>Proton transport</b>                                           | 4  | 0.00320356 | Q53GB3, P06576, P30049, Q6FG90, O75947,                                                         |
| <b>Hydrogen transport</b>                                         | 4  | 0.00330633 | Q53GB3, P06576, P30049, Q6FG90, O75947,                                                         |
| <b>Inorganic cation transmembrane transporter activity</b>        | 5  | 0.00331868 | Q53GB3, P06576, P30049, Q6FG90, O75947, P47985,                                                 |
| <b>Response to chemical stimulus</b>                              | 8  | 0.0036814  | P00441, P16219, Q9UNM1, P32119, O43181, P11142, Q53GZ6, Q4ZG20, Q8WVW5,                         |
| <b>Purine nucleotide biosynthetic process</b>                     | 4  | 0.0037376  | Q53GB3, P06576, P30049, Q6FG90, O75947,                                                         |
| <b>Ribonucleotide biosynthetic process</b>                        | 4  | 0.0037376  | Q53GB3, P06576, P30049, Q6FG90, O75947,                                                         |
| <b>Actin-binding</b>                                              | 5  | 0.00377841 | Q9UBC5, P63313, Q596K9, P09493, Q8NBV9, P62328,                                                 |
| <b>Purine ribonucleotide metabolic process</b>                    | 4  | 0.00396551 | Q53GB3, P06576, P30049, Q6FG90, O75947,                                                         |
| <b>ATPase activity, coupled to transmembrane movement of ions</b> | 4  | 0.00397564 | Q53GB3, P06576, P30049, Q6FG90, O75947,                                                         |
| <b>Cytoskeleton</b>                                               | 6  | 0.00430479 | P63313, Q596K9, P09493, Q8WVW5, Q8NBV9, P62328, P50461,                                         |
| <b>Striated muscle development</b>                                | 4  | 0.00457183 | P60660, Q4ZG20, Q8WVW5, P50461,                                                                 |
| <b>Purine nucleotide metabolic process</b>                        | 4  | 0.00496112 | Q53GB3, P06576, P30049, Q6FG90, O75947,                                                         |
| <b>Ribonucleotide metabolic process</b>                           | 4  | 0.0050952  | Q53GB3, P06576, P30049, Q6FG90, O75947,                                                         |
| <b>ATPase activity</b>                                            | 6  | 0.00538401 | Q53GB3, P06576, P30049, Q6FG90, O75947, P11142, Q53GZ6, P60660,                                 |
| <b>Structural molecule activity</b>                               | 9  | 0.00554804 | Q53R15, P09493, P10916, Q6IB42, P02511, P08590, P60660, Q4ZG20, Q8WVW5, P08670, Q53HU8,         |
| <b>Mitochondrial membrane part</b>                                | 4  | 0.00600837 | P06576, P30049, Q6FG90, O43181, P47985,                                                         |
| <b>Coenzyme biosynthetic process</b>                              | 4  | 0.00671557 | Q53GB3, P06576, P30049, Q6FG90, O75947,                                                         |
| <b>Regulation of apoptosis</b>                                    | 7  | 0.00849787 | Q9UKL3, P00441, Q9UNM1, Q5T2B7, P32119, P02511, Q8NBV9,                                         |
| <b>Organ development</b>                                          | 11 | 0.00859268 | Q53R15, P00441, O43181, Q6IAQ7, Q9UII2, P02511, Q06830, P60660, Q4ZG20, Q8WVW5, Q8NBV9, P50461, |
| <b>Regulation of programmed cell death</b>                        | 7  | 0.00894974 | Q9UKL3, P00441, Q9UNM1, Q5T2B7, P32119, P02511, Q8NBV9,                                         |

|                                                                                                       |    |            |                                                                                                                                                                                                                                                                                                                                                 |
|-------------------------------------------------------------------------------------------------------|----|------------|-------------------------------------------------------------------------------------------------------------------------------------------------------------------------------------------------------------------------------------------------------------------------------------------------------------------------------------------------|
| <b>Intracellular membrane-bound organelle</b>                                                         | 33 | 0.00922883 | Q9NTJ5, Q8NEZ4, Q53GB3, P00441, Q9UNM1, Q96DD3, P06733, P13929, Q9NPL4, Q969V3, Q13011, P50461, P30048, Q53HC2, O43181, P06576, P00505, Q9UKL3, P30049, Q6FG90, P16219, Q5TCW3, Q9BX68, O75947, Q00325, Q8NCF7, Q06830, Q4ZG20, Q8WVW5, P47985, P28330, Q7Z5G3, Q9NUB1, Q59EI6, P42765, Q99996, P11142, Q53GZ6, P17540, P02511, Q6IAQ7, Q9UII2, |
| <b>Membrane-bound organelle</b>                                                                       | 33 | 0.00929701 | Q9NTJ5, Q8NEZ4, Q53GB3, P00441, Q9UNM1, Q96DD3, P06733, P13929, Q9NPL4, Q969V3, Q13011, P50461, P30048, Q53HC2, O43181, P06576, P00505, Q9UKL3, P30049, Q6FG90, P16219, Q5TCW3, Q9BX68, O75947, Q00325, Q8NCF7, Q06830, Q4ZG20, Q8WVW5, P47985, P28330, Q7Z5G3, Q9NUB1, Q59EI6, P42765, Q99996, P11142, Q53GZ6, P17540, P02511, Q6IAQ7, Q9UII2, |
| <b>Membrane-enclosed lumen</b>                                                                        | 9  | 0.00938035 | P00505, Q53GB3, Q7Z5G3, Q9NUB1, P00441, P16219, Q9UNM1, Q96DD3, Q8WVW5, P28330,                                                                                                                                                                                                                                                                 |
| <b>Organelle lumen</b>                                                                                | 9  | 0.00938035 | P00505, Q53GB3, Q7Z5G3, Q9NUB1, P00441, P16219, Q9UNM1, Q96DD3, Q8WVW5, P28330,                                                                                                                                                                                                                                                                 |
| <b>ATPase activity, coupled to transmembrane movement of substances</b>                               | 4  | 0.00940214 | Q53GB3, P06576, P30049, Q6FG90, O75947,                                                                                                                                                                                                                                                                                                         |
| <b>ATPase activity, coupled to movement of substances</b>                                             | 4  | 0.00958311 | Q53GB3, P06576, P30049, Q6FG90, O75947,                                                                                                                                                                                                                                                                                                         |
| <b>Cofactor biosynthetic process</b>                                                                  | 4  | 0.01016742 | Q53GB3, P06576, P30049, Q6FG90, O75947,                                                                                                                                                                                                                                                                                                         |
| <b>Hydrolase activity, acting on acid anhydrides, catalyzing transmembrane movement of substances</b> | 4  | 0.01090708 | Q53GB3, P06576, P30049, Q6FG90, O75947,                                                                                                                                                                                                                                                                                                         |
| <b>Primary active transmembrane transporter activity</b>                                              | 4  | 0.01191456 | Q53GB3, P06576, P30049, Q6FG90, O75947,                                                                                                                                                                                                                                                                                                         |
| <b>P-P-bond-hydrolysis-driven transmembrane transporter activity</b>                                  | 4  | 0.01191456 | Q53GB3, P06576, P30049, Q6FG90, O75947,                                                                                                                                                                                                                                                                                                         |
| <b>Cellular catabolic process</b>                                                                     | 7  | 0.0136193  | P00505, P00441, P60174, Q6FHP9, Q96DD3, P06733, P13929, Q9NPL4, Q6P6D7, P09104,                                                                                                                                                                                                                                                                 |
| <b>Actin binding</b>                                                                                  | 5  | 0.0136304  | Q9UBC5, P63313, Q596K9, P09493, Q8NBV9, P62328,                                                                                                                                                                                                                                                                                                 |
| <b>Macromolecule catabolic</b>                                                                        | 6  | 0.015430   | P00441, P60174, Q6FHP9, Q96DD3,                                                                                                                                                                                                                                                                                                                 |

|                                                       |    |            |                                                                                                                                                                                                                                                                                                         |
|-------------------------------------------------------|----|------------|---------------------------------------------------------------------------------------------------------------------------------------------------------------------------------------------------------------------------------------------------------------------------------------------------------|
| <b>Process</b>                                        |    | 81         | P06733, P13929, Q9NPL4, Q6P6D7, P09104,                                                                                                                                                                                                                                                                 |
| <b>Organelle organization and biogenesis</b>          | 10 | 0.01578972 | Q8NEZ4, P00441, P63313, Q596K9, O43181, P60660, Q4ZG20, Q8WVW5, P08670, Q53HU8, Q8NBV9, P62328,                                                                                                                                                                                                         |
| <b>Regulation of multicellular organismal process</b> | 5  | 0.01587673 | P00441, P09493, P10916, Q6IB42, P63316, Q6FH91, P50461,                                                                                                                                                                                                                                                 |
| <b>Cellular lipid metabolic process</b>               | 7  | 0.01674291 | P00441, P16219, Q5QPQ0, P42765, P60174, Q6FHP9, Q13011, P28330,                                                                                                                                                                                                                                         |
| <b>Nucleotide biosynthetic process</b>                | 4  | 0.0171158  | Q53GB3, P06576, P30049, Q6FG90, O75947,                                                                                                                                                                                                                                                                 |
| <b>Pathway</b>                                        | 8  | 0.01936408 | P16219, P42765, Q5T2B7, P60174, Q6FHP9, P06733, P13929, Q9NPL4, Q13011, P09104, P28330,                                                                                                                                                                                                                 |
| <b>Sequence variant</b>                               | 30 | 0.025542   | Q8NEZ4, Q53GB3, P00441, P02792, O00635, P10916, Q6IB42, P06733, P13929, Q9NPL4, Q969V3, Q13011, P50461, Q8N7G1, P30048, Q53HC2, P09493, P08590, P63316, Q6FH91, P00505, P16219, Q9UBC5, Q00325, Q8NCF7, Q06830, P60660, Q8WVW5, P28330, Q59EI6, Q5T2B7, P32119, Q99996, P60174, Q6FHP9, P02511, P09104, |
| <b>Cytosol</b>                                        | 6  | 0.02606794 | P00441, P30048, Q53HC2, P06733, P13929, Q9NPL4, Q6P6D7, P09104, Q8WVW5,                                                                                                                                                                                                                                 |
| <b>Adenyl nucleotide binding</b>                      | 11 | 0.02610214 | P06576, Q7Z5G3, Q9NUB1, P30086, P16219, Q9UBC5, Q9UNM1, P11142, Q53GZ6, P17540, Q4ZG20, Q8WVW5, P28330,                                                                                                                                                                                                 |
| <b>Disease</b>                                        | 15 | 0.02660108 | P00441, P02792, P16219, Q9UBC5, Q00325, Q8NCF7, P10916, Q6IB42, P06733, P13929, Q9NPL4, Q8WVW5, P28330, P50461, Q8N7G1, P09493, P60174, Q6FHP9, P08590, P02511,                                                                                                                                         |
| <b>Cellular carbohydrate metabolic process</b>        | 5  | 0.0286043  | P60174, Q6FHP9, Q96DD3, P06733, P13929, Q9NPL4, Q6P6D7, P09104,                                                                                                                                                                                                                                         |
| <b>Cellular macromolecule catabolic process</b>       | 5  | 0.02912654 | P60174, Q6FHP9, Q96DD3, P06733, P13929, Q9NPL4, Q6P6D7, P09104,                                                                                                                                                                                                                                         |
| <b>Calcium ion binding</b>                            | 8  | 0.03003221 | Q53R15, P10916, Q6IB42, P08590, P60660, P63316, Q6FH91, P62158, Q9BRL5, Q4ZG20, Q8NBV9,                                                                                                                                                                                                                 |
| <b>Organelle membrane</b>                             | 10 | 0.03093395 | Q53GB3, P06576, P30049, Q6FG90, Q00325, Q8NCF7, P42765, O43181, P17540, Q96DD3, Q969V3, P47985,                                                                                                                                                                                                         |
| <b>Active transmembrane transporter activity</b>      | 5  | 0.03106502 | Q53GB3, P06576, P30049, Q6FG90, O75947, Q00325, Q8NCF7,                                                                                                                                                                                                                                                 |
| <b>carbohydrate metabolic process</b>                 | 6  | 0.03351184 | P60174, Q6FHP9, Q96DD3, P06733, P13929, Q9NPL4, Q6P6D7, P09104, Q4ZG20,                                                                                                                                                                                                                                 |

|                                                  |    |                |                                                                                                                                                                                                                                                                                                                                 |
|--------------------------------------------------|----|----------------|---------------------------------------------------------------------------------------------------------------------------------------------------------------------------------------------------------------------------------------------------------------------------------------------------------------------------------|
| <b>Phosphoprotein</b>                            | 22 | 0.034318<br>59 | Q9UKL3, P00505, P06576, Q8NEZ4, P10916, Q6IB42, Q06830, P06733, P13929, Q9NPL4, Q13011, Q8WVW5, P08670, Q53HU8, P62328, P30086, Q5T2B7, O43181, Q99996, P11142, Q53GZ6, P60174, Q6FHP9, P02511, Q6P6D7, P62158, Q9BRL5, P09104, Q8ND56,                                                                                         |
| <b>Regulation of a molecular function</b>        | 6  | 0.036071<br>97 | Q9UKL3, Q59EI6, P00441, P30048, Q53HC2, Q9UNM1, Q6IAQ7, Q9UII2,                                                                                                                                                                                                                                                                 |
| <b>Catabolic process</b>                         | 7  | 0.036178<br>46 | P00505, P00441, P60174, Q6FHP9, Q96DD3, P06733, P13929, Q9NPL4, Q6P6D7, P09104,                                                                                                                                                                                                                                                 |
| <b>Protein binding</b>                           | 30 | 0.036843<br>51 | Q8NEZ4, Q53GB3, P00441, P02792, Q9UNM1, P63313, Q596K9, O00635, P10916, Q6IB42, P06733, P13929, Q9NPL4, Q13011, P50461, P62328, P30048, Q53HC2, P09493, P63316, Q6FH91, P06576, Q9UKL3, Q9UBC5, Q4ZG20, P08670, Q53HU8, Q8WVW5, Q8NBV9, P30086, Q59EI6, Q5T2B7, Q99996, P11142, Q53GZ6, P02511, Q6IAQ7, Q9UII2, P62158, Q9BRL5, |
| <b>Induction</b>                                 | 7  | 0.037449<br>03 | Q9UKL3, Q9UNM1, P11142, Q53GZ6, P06733, P13929, Q9NPL4, Q06830, P09104, P62328,                                                                                                                                                                                                                                                 |
| <b>Actin filament-based process</b>              | 4  | 0.039048<br>24 | P60660, Q4ZG20, Q8WVW5, Q8NBV9,                                                                                                                                                                                                                                                                                                 |
| <b>Lipid metabolic process</b>                   | 7  | 0.039928<br>56 | P00441, P16219, Q5QPQ0, P42765, P60174, Q6FHP9, Q13011, P28330,                                                                                                                                                                                                                                                                 |
| <b>Apoptosis</b>                                 | 7  | 0.044379<br>66 | Q9UKL3, P00441, Q9UNM1, Q5T2B7, P32119, P02511, Q8NBV9,                                                                                                                                                                                                                                                                         |
| <b>Nucleoside-triphosphatase activity</b>        | 6  | 0.044815<br>52 | Q53GB3, P06576, P30049, Q6FG90, O75947, P11142, Q53GZ6, P60660,                                                                                                                                                                                                                                                                 |
| <b>positive regulation of catalytic activity</b> | 4  | 0.044863<br>64 | Q9UKL3, Q59EI6, P00441, Q9UNM1,                                                                                                                                                                                                                                                                                                 |
| <b>Programmed cell death</b>                     | 7  | 0.046009<br>19 | Q9UKL3, P00441, Q9UNM1, Q5T2B7, P32119, P02511, Q8NBV9,                                                                                                                                                                                                                                                                         |
| <b>Anatomical structure development</b>          | 13 | 0.046212<br>95 | Q53R15, P00441, Q9UBC5, Q06830, P06733, P13929, Q9NPL4, P60660, Q4ZG20, Q8WVW5, Q8NBV9, P50461, O43181, P02511, Q6IAQ7, Q9UII2,                                                                                                                                                                                                 |
