# Supplementary material
Source: PubMed Central journal article supplement (PMC2712218)
Supplement: 00033.2009_3.pdf [file 00033.2009_3.pdf]

1 **Table S2: Number of genes/proteins enriched in GO categories and pathways.**

| TERMS                                                                            | Proteomics<br>(-log P<br>value) | Genomics<br>(-log P<br>value) | No of<br>proteins | No of<br>cDNA |
|----------------------------------------------------------------------------------|---------------------------------|-------------------------------|-------------------|---------------|
| <b>Components</b>                                                                |                                 |                               |                   |               |
| Mitochondrion                                                                    | 7.7                             | 3.7                           | 16                | 14            |
| Mitochondrion Inner Membrane                                                     | 5.9                             | 1.4                           | 9                 | 4             |
| Cytoplasm                                                                        | 5.7                             | 0.5                           | 30                | 30            |
| Contractile Fiber                                                                | 5.2                             | 2.1                           | 5                 | 3             |
| Mitochondrial Envelope                                                           | 5.1                             | 1.1                           | 9                 | 4             |
| Mitochondrion Matrix                                                             | 3.9                             | 3.9                           | 8                 | 6             |
| Mitochondrion Lumen                                                              | 3.9                             | 3.9                           | 8                 | 6             |
| Membrane enclosed Lumen                                                          | 0.7                             | 2.8                           | 4                 | 14            |
| Extracellular Space                                                              | 0.1                             | 3.3                           | 4                 | 24            |
| <b>GO Biological Processes</b>                                                   |                                 |                               |                   |               |
| cardiac muscle contraction                                                       | 7.8                             | 0.9                           | 5                 | 1             |
| heart contraction                                                                | 6.0                             | 1.0                           | 5                 | 1             |
| striated muscle contraction                                                      | 5.8                             | 0.6                           | 5                 | 1             |
| glucose metabolic process                                                        | 4.1                             | 0.8                           | 5                 | 1             |
| fatty acid beta-oxidation                                                        | 2.4                             | 3.4                           | 2                 | 3             |
| fatty acid metabolic process                                                     | 2.4                             | 4.2                           | 4                 | 7             |
| fatty acid catabolic process                                                     | 2.1                             | 3                             | 2                 | 3             |
| carboxylic acid catabolic process                                                | 2.0                             | 2.9                           | 6                 | 8             |
| involuntary skeletal muscle contraction                                          | 2.0                             | 1.9                           | 1                 | 1             |
| positive regulation of muscle development                                        | 1.7                             | 1.5                           | 1                 | 1             |
| blood vessel morphogenesis                                                       | 0.7                             | 3.7                           | 3                 | 5             |
| blood vessel development                                                         | 0.6                             | 3.4                           | 3                 | 5             |
| vasculature development                                                          | 0.6                             | 3.4                           | 3                 | 5             |
| <b>GO Metabolic Functions</b>                                                    |                                 |                               |                   |               |
| phosphopyruvate Hydratase activity                                               | 7.3                             | 0                             | 3                 | 0             |
| peroxiredoxin activity                                                           | 6.4                             | 0                             | 3                 | 0             |
| hydro-lyase activity                                                             | 4.9                             | 0.8                           | 4                 | 1             |
| carbon-oxygen lyase activity                                                     | 4.7                             | 0.6                           | 4                 | 1             |
| catalytic activity                                                               | 3.3                             | 2.5                           | 21                | 35            |
| acyl-CoA dehydrogenase activity                                                  | 1.4                             | 2.8                           | 1                 | 2             |
| endopeptidase activity                                                           | 0.5                             | 8.0                           | 1                 | 13            |
| serine-type endopeptidase activity                                               | 0.5                             | 12.9                          | 1                 | 13            |
| serine hydrolase activity                                                        | 0.4                             | 12.2                          | 1                 | 13            |
| <b>Canonical Pathways</b>                                                        |                                 |                               |                   |               |
| Glycolysis and gluconeogenesis p.3                                               | 6.0                             | 0                             | 4                 | 0             |
| Cytoskeleton remodeling Alpha-1A adrenergic receptor-dependent inhibition of PI3 | 4.5                             | 0                             | 3                 | 0             |
| Oxidative phosphorylation                                                        | 3.3                             | 0.5                           | 4                 | 1             |
| Cytoskeleton remodeling Regulation of actin cytoskeleton by Rho GTPases          | 2.7                             | 1.3                           | 2                 | 1             |
| Prostaglandin 2 biosynthesis and metabolism                                      | 2.5                             | 0                             | 3                 |               |
| Development Beta-adrenergic receptors signaling via cAMP                         | 1.9                             | 0.8                           | 2                 | 1             |
| Butanoate metabolism                                                             | 1.7                             | 1.8                           | 2                 | 2             |
| Mitochondrial long chain fatty acid beta-oxidation                               | 0.6                             | 4.6                           | 1                 | 4             |
| Propionate metabolism p.1                                                        | 0                               | 3.5                           | 0                 | 4             |
| Cell adhesion ECM remodeling                                                     | 0                               | 3.4                           | 0                 | 3             |
