# Supplementary material
Source: PubMed Central journal article supplement (PMC2712218)

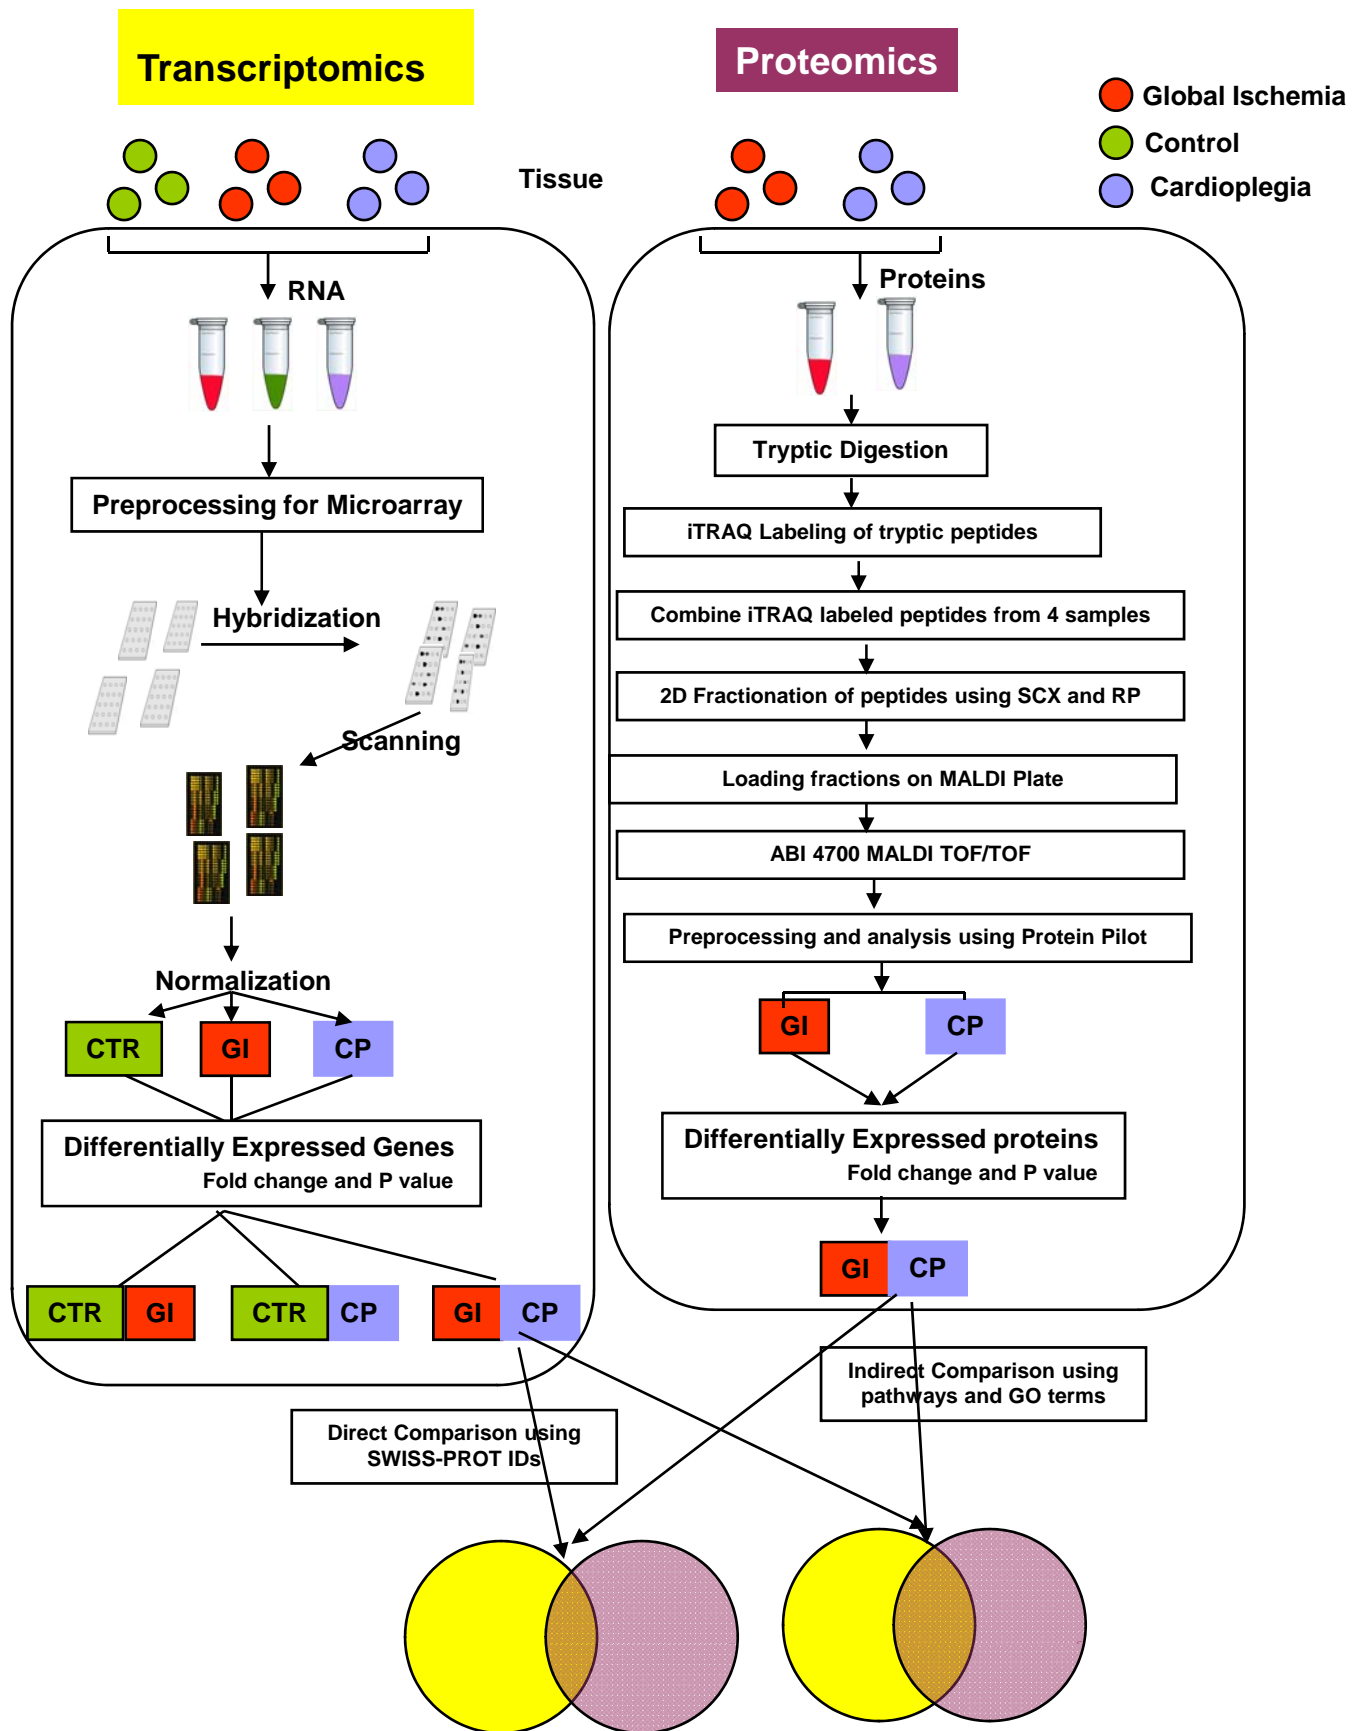

McCully et al. Figure S1

Supplement: 00033.2009_1.pdf [file 00033.2009_1.pdf]
